# Supplementary material for: Targeting the Axl and mTOR Pathway Synergizes Immunotherapy and Chemotherapy to Butylidenephthalide in a Recurrent GBM
Source: J Oncol. 2022 May 18;2022:3236058. doi: 10.1155/2022/3236058 (PMC9132698; doi:10.1155/2022/3236058)
Supplement: Supplementary Materials — The supplementary materials include preparation of activated immune cells and interferon gamma quantification (supplementary figures 1, 2, and 3). [file 3236058.f1.zip]

Archive with 4 entries (4 files):
- 3236058.f1/2022 5 2 Supplemental materials.docx
- 3236058.f1/Supplemental Figure 1.pptx
- 3236058.f1/Supplemental Figure 2.pptx
- 3236058.f1/Supplemental Figure 3.pptx
